# Supplementary material
Source: publisher figshare collection journal article supplement (https://karger.figshare.com/articles/dataset/_/5122948)

**Supplementary Fig. S1.** Ingenuity pathway analysis of genes commonly altered by treatments with ATZ, Thap, and Tuni showed a decrease in most OXPHOS complex subunits in mitochondria. Green and red genes denote decreased and increased expression by each agent, respectively.

Supplementary Figure S1

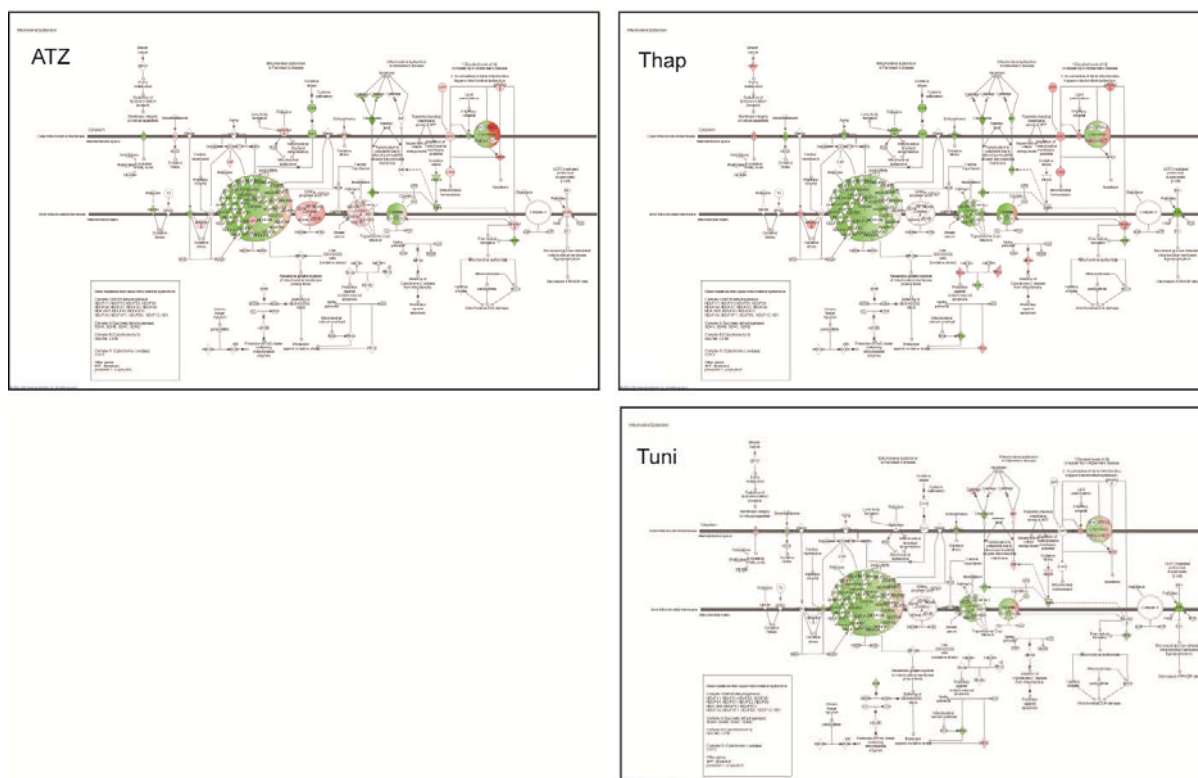

Supplement: Supplementary file 1 [file 1]
